1 A role for *Toxoplasma gondii* chloroquine resistance transporter in bradyzoite viability and  
2 digestive vacuole maintenance

3

4 Geetha Kannan<sup>a</sup>, Manlio Di Cristina<sup>b</sup>, Aric J. Schultz<sup>a</sup>, My-Hang Huynh<sup>a</sup>, Fengrong Wang<sup>a</sup>,  
5 Tracey L. Schultz<sup>a,\*</sup>, Matteo Lunghi<sup>b,\*\*</sup>, Isabelle Coppens<sup>c</sup>, Vern B. Carruthers<sup>1,#</sup>

6

7 <sup>a</sup>Department of Microbiology and Immunology, University of Michigan Medical School, Ann  
8 Arbor, MI 48109, USA

9 <sup>b</sup>Department of Chemistry, Biology and Biotechnology, University of Perugia, Perugia  
10 06122, Italy

11 <sup>c</sup>Department of Molecular Microbiology and Immunology, The Johns Hopkins University  
12 Bloomberg School of Public Health, Baltimore, MD 21205, USA

13

14 Running head: Role of TgCRT in chronic *Toxoplasma* infection

15

16 #Address correspondence to: Vern B. Carruthers, [vcarruth@umich.edu](mailto:vcarruth@umich.edu)

17

18 \*Present address: Biosciences Center, National Renewable Energy Laboratory, Golden,  
19 CO, USA

20 \*\*Present address: Department of Microbiology and Molecular Medicine, CMU, University  
21 of Geneva, 1 Rue Michel-Servet CH-1211 Geneva 4, Switzerland

22

23

24

25 **ABSTRACT**

26 *Toxoplasma gondii* is a ubiquitous pathogen that can cause encephalitis, congenital  
27 defects, and ocular disease. *T. gondii* has also been implicated as a risk factor for mental  
28 illness in humans. The parasite persists in the brain as slow growing bradyzoites contained  
29 within intracellular cysts. No treatments exist to eliminate this form of parasite. Although  
30 proteolytic degradation within the parasite lysosomal-like vacuolar compartment (VAC) is  
31 critical for bradyzoite viability, whether other aspects of the VAC are important for parasite  
32 persistence remains unknown. An ortholog of *Plasmodium falciparum* CRT has previously  
33 been identified in *T. gondii* (TgCRT). To interrogate the function of TgCRT in chronic stage  
34 bradyzoites and its role in persistence, we knocked out TgCRT in a cystogenic strain and  
35 assessed VAC size, VAC digestion of host- derived proteins and parasite  
36 autophagosomes, and viability of *in vitro* and *in vivo* bradyzoites. We found that whereas  
37 parasites deficient in TgCRT exhibit normal digestion within the VAC, they display a  
38 markedly distended VAC and their viability is compromised both *in vitro* and *in vivo*.  
39 Interestingly, impairing VAC proteolysis in TgCRT deficient bradyzoites restored VAC size,  
40 consistent with a role for TgCRT as a transporter of products of digestion from the VAC. In  
41 conjunction with earlier studies, our current findings suggest a functional link between  
42 TgCRT and VAC proteolysis. This work provides further evidence of a crucial role for the  
43 VAC in bradyzoite persistence and a new potential VAC target to abate chronic  
44 *Toxoplasma* infection.

45

46 **IMPORTANCE**

47 Individuals chronically infected with the intracellular parasite *Toxoplasma gondii* are at risk  
48 of experiencing reactivated disease that can result in progressive loss of vision. No

49 effective treatments exist for chronic toxoplasmosis due in part to a poor understanding of  
50 the biology underlying chronic infection and a lack of well validated potential targets. Here  
51 we show that a *T. gondii* transporter is functionally linked to protein digestion within the  
52 parasite lysosome-like organelle and that this transporter is necessary to sustain chronic  
53 infection in culture and in experimentally infected mice. Ablating the transporter results in  
54 severe bloating of the lysosome-like organelle. Together with earlier work, this study  
55 suggests the parasite's lysosome-like organelle is vital for parasite survival, thus rendering  
56 it a potential target for diminishing infection and reducing the risk of reactivated disease.

57

## 58 **INTRODUCTION**

59 *Toxoplasma gondii* (*T. gondii*) is an opportunistic pathogen that causes encephalitis or  
60 debilitating ocular and congenital diseases in humans (1-4). It has also been implicated as  
61 a risk factor for schizophrenia and other major mental illnesses (5-8). The parasite  
62 progresses through two major life stages during infection of its intermediate hosts: the  
63 acute stage characterized by actively replicating tachyzoites and the chronic stage  
64 featuring slow growing bradyzoite cysts that persist in muscle and brain tissue (9). While  
65 drugs exist against acute stage tachyzoites, currently no treatments are available to  
66 combat the chronic stage bradyzoite cysts. The development of new interventions for  
67 limiting disease from chronic infection is hindered by a lack of well-validated potential  
68 targets and understanding of the biology of *T. gondii* bradyzoites.

69

70 One avenue toward this goal is to define the contributions of proteins associated with the  
71 parasite Plant-Like Vacuole (PLV)/Vacuolar Compartment (VAC, used hereafter). The *T.*  
72 *gondii* VAC is a lysosome-like organelle that contains a variety of proteases, including

73 those of the cathepsin family (10, 11). It was previously shown that *T. gondii* cathepsin  
74 protease L (TgCPL) localizes to the lumen of the VAC where it aids in the digestion of  
75 ingested host-derived proteins and parasite autophagosomes (11-13). Diminishing the  
76 digestive function of the VAC by either genetic ablation of TgCPL or chemical inhibition of  
77 TgCPL with morpholinurea-leucine-homophenylalanine-vinyl phenyl sulphone (LHVS)  
78 revealed an critical role for the VAC in parasite viability, particularly in the bradyzoite stage  
79 (11, 13, 14).

80

81 The *T. gondii* VAC also possesses transmembrane proteins, including an orthologue of the  
82 *Plasmodium falciparum* chloroquine resistance transporter (PfCRT) (15). *Arabidopsis*  
83 *thaliana* expresses a homologue of PfCRT as well, which is involved in export of  
84 glutathione from plant chloroplasts (16). Similarly, PfCRT has been implicated in the  
85 transport of amino acids and peptides out of the digestive vacuole, and is also important  
86 for efflux of chloroquine from the malaria digestive vacuole to the parasite cytosol (17).  
87 Recent work utilizing yeast demonstrated that *T. gondii* CRT (TgCRT) is also capable of  
88 transporting chloroquine (18). Thus, similar to PfCRT, *T. gondii* CRT (TgCRT) might also  
89 transport small amino acids and peptides out of the *T. gondii* VAC and into the parasite  
90 cytosol. Two studies have revealed that *T. gondii* RH tachyzoites deficient in TgCRT,  
91 either by inducible knockdown or complete genetic ablation, exhibit an enlarged VAC (15,  
92 18). In addition, expansion of the VAC in TgCRT deficient tachyzoites is diminished when  
93 parasite digestion is impaired by genetic ablation of cathepsin protease B (TgCPB) or  
94 chemical inhibition of TgCPL with LHVS (18). Thus, the distended VAC in TgCRT deficient  
95 tachyzoites was postulated to be due to increased osmotic pressure from a buildup of  
96 digestion products that could not be transported out of the VAC (15, 18). TgCRT deficient

97 tachyzoites also grow more slowly *in vitro* and are compromised in their ability to cause  
98 mortality in mice during acute infection, suggesting an inability to transport digested  
99 material out of the VAC and into the parasite cytosol has a moderate effect on *T. gondii*  
100 tachyzoites (15, 18)

101  
102 However, the extent to which TgCRT functions as a transporter of digestion products in  
103 bradyzoite cysts and thereby contributes to VAC morphology or function, or whether it is  
104 necessary for parasite viability during the chronic stage of infection, is unknown. We  
105 therefore sought to define the function of TgCRT in bradyzoites and its contribution to  
106 bradyzoite survival. To study this, we created a knockout of TgCRT in a cystogenic strain  
107 and assessed VAC morphology, *in vitro* and *in vivo* viability, and VAC digestion of host- or  
108 parasite-derived material in TgCRT deficient bradyzoites. We show that these bradyzoites  
109 exhibit a severely bloated VAC, that TgCRT appears to function downstream of protein  
110 digestion within the VAC, and that TgCRT deficiency results in loss of bradyzoite viability.

111

## 112 **RESULTS**

113 **P $\Delta$ crt parasites exhibit a markedly distended VAC.** To examine the role of TgCRT in  
114 bradyzoites, we knocked out TgCRT in the cystogenic type II Prugniaud strain (P $\Delta$ crt) and  
115 restored its expression via genetic complementation (P $\Delta$ crt:CRT) (Fig. S1 & S2).

116 Consistent with TgCRT playing a role in VAC morphology, P $\Delta$ crt extracellular tachyzoites  
117 (Fig. 1A) and bradyzoites isolated from *in vitro* cysts (Fig. 1B) show a larger translucent  
118 vacuole associated with the VAC marker TgCPL than the parental and complement  
119 strains. The translucent vacuole was also observed within intact *in vitro* TgCRT deficient  
120 bradyzoite cysts, as seen by phase contrast (Fig. 1C) and electron microscopy (EM) (Fig.

121 1D), suggesting VAC enlargement in bradyzoites is not strictly a consequence of being in  
122 an extracellular environment. Quantification of EM images reveals a 5-fold enlargement of  
123 VAC area in  $P\Delta crt$  bradyzoites as compared with the parental and complement strains  
124 (Fig. 1E). These results indicate that TgCRT deficiency in a cystogenic type II strain results  
125 in a pronounced enlargement of the VAC in both tachyzoites and bradyzoites.

126

127 **TgCRT is required for *in vitro* bradyzoite viability and *in vivo* cyst burden.** Previous  
128 work established that proteolytic digestion of material in the VAC is necessary for survival  
129 of *T. gondii* bradyzoites *in vitro* and *in vivo* (13). Because TgCRT is important for  
130 maintaining normal VAC morphology, we reasoned that TgCRT deficiency might  
131 compromise bradyzoite viability. We first wanted to address whether the lack of TgCRT  
132 affected the rate or efficiency of tachyzoite to bradyzoite conversion and bradyzoite  
133 replication. The parasite strains used express GFP under the early bradyzoite LDH2  
134 promoter (19). To assess conversion, we measured the percentage of parasite-containing  
135 vacuoles that were greater than 50% positive for GFP or the more mature stage bradyzoite  
136 specific marker TgBAG1 over the first 4 days of conversion. For both early- and mature-  
137 bradyzoite stage markers analyzed, we found that all strains converted at a similar rate  
138 (Fig. S3). In addition, we measured the cyst size as an indicator of bradyzoite replication at  
139 1 and 2 weeks post-conversion and found them to be comparable amongst all strains at  
140 both time points (Fig. S4). These findings suggest that TgCRT is not necessary for acute  
141 to chronic stage differentiation or replication of chronic stage parasites up to 2 weeks *in*  
142 *vitro*.

143

144 We then sought to assess the extent to which TgCRT deficiency affects bradyzoite viability  
145 *in vitro*. First we measured the expression of GFP as a proxy of bradyzoite health. It was  
146 previously shown that as bradyzoite viability decreases, there is a shift from cysts being  
147 uniformly GFP positive to partially positive (mixture of GFP positive and GFP negative) to  
148 fully GFP negative (13). Although we found that P $\Delta$ crt cysts were uniformly GFP positive  
149 (Fig. 2A) the intensity of GFP was diminished at 2 weeks, but not 1 week, post-conversion  
150 (Fig. 2B), suggesting a temporal decrease in gene expression. Next we more directly  
151 evaluated bradyzoite viability using a qPCR/plaque assay (13), which measures the ability  
152 of bradyzoites to initiate plaque formation relative to the inoculum (plaques/1000  
153 genomes). We found that P $\Delta$ crt bradyzoite viability was decreased at 2 weeks, but not 1  
154 week, post-conversion (Fig. 2C), mirroring the findings for GFP intensity. As a decrease in  
155 plaques/genomes could be attributed to a deficiency in the ability of P $\Delta$ crt parasites to form  
156 plaques, we conducted a tachyzoite plaque assay that revealed P $\Delta$ crt tachyzoites have no  
157 deficit in the number of plaques formed (Fig. S5). Together these findings indicate a  
158 progressive loss of P $\Delta$ crt bradyzoite viability *in vitro*.

159  
160 To determine whether deletion of TgCRT affects the chronic infection *in vivo* we infected  
161 C57BL/6 mice and enumerated brain cysts at 4 weeks post-infection. Mice inoculated with  
162 P $\Delta$ crt tachyzoites showed a ~10-fold decrease in brain cyst burden compared with those  
163 inoculated with the parental or complement strains (Fig. 3A). The reduction in cyst burden  
164 was not due to a lack of infection since all mice were seropositive for *T. gondii* IgG,  
165 including those in which no cysts were observed (Fig. 3B). However, it is possible that the  
166 reduced number of P $\Delta$ crt brain cysts observed was due to fewer tachyzoites entering the  
167 brain during acute infection. To examine this, we used qPCR to measure initial levels of

168 infection in the brain at days 7 and 10 post-infection. Compared to those infected with  
169 parental or complement strains, mice infected with  $P\Delta crt$  parasites showed a 2-3 fold lower  
170 brain burden, suggesting that the decrease in cyst burden at 5 weeks post-infection is  
171 partly attributable to lower initial infection of the brain.

172

173 Because we found that *in vitro* TgCRT deficient bradyzoites are less viable, we wanted to  
174 examine whether residual *in vivo*  $P\Delta crt$  cysts are infectious. To test this, we inoculated  
175 naïve mice with 5 or 30 cysts from the brains of mice chronically infected with Pru,  $P\Delta crt$ ,  
176 or  $P\Delta crt:CRT$ . Once in the chronic phase, infection of naïve mice was monitored via  
177 serology and by determining whether parasites could be cultured from their brain  
178 homogenates. To serve as a negative control, 5 naïve mice were inoculated with brain  
179 homogenate from an uninfected mouse. All mice inoculated with  $P\Delta crt$  brain cysts were  
180 seropositive, indicating that  $P\Delta crt$  cysts contain infectious bradyzoites (Fig. 3D). However,  
181 only 50% of the seropositive mice were culture positive. In contrast, while not all mice  
182 inoculated with parental or complement brain cysts were seropositive, parasites were  
183 cultured from the brains of 100% of the seropositive mice. Taken together, our *in vitro* and  
184 *in vivo* data indicate that TgCRT deficient bradyzoites show a decrease, but not absolute  
185 loss, of viability.

186

187 **Digestion in the VAC of TgCRT deficient tachyzoites and bradyzoites.** We next  
188 wanted to interrogate whether the decreased viability in TgCRT deficient bradyzoites is  
189 possibly due to an impairment of proteolytic digestion in the VAC. Pru strain tachyzoites  
190 and bradyzoites deficient in the VAC protease TgCPL ( $P\Delta cpl$ ) have a deficit in digestion  
191 and reduced bradyzoite viability (13). It was recently suggested that  $RH\Delta crt$  tachyzoites



192 have 25% less TgCPL, but the extent to which this affects VAC digestion was not  
193 assessed (18). To probe whether TgCRT deficiency affects VAC digestion in tachyzoites,  
194 we utilized a tachyzoite ingestion/digestion assay that permits the detection of ingested  
195 and undigested host-derived mCherry within tachyzoites (12). We included  $P\Delta cpl$  as a  
196 reference control since these parasites accumulate host-derived mCherry due to a  
197 deficiency in VAC proteolytic activity (11, 13, 14). We also created a  $P\Delta crt\Delta cpl$  double  
198 knockout strain by ablating TgCRT in the  $P\Delta cpl$  strain to determine whether a lack of  
199 accumulated host-derived material in  $P\Delta crt$  parasites is due to functional digestion or  
200 problems in protein delivery to the VAC (Fig. S1). Western blotting confirmed that TgCPL  
201 was expressed in all strains except for  $P\Delta cpl$  and  $P\Delta crt\Delta cpl$  (Fig. 4A). Accumulation of  
202 host-derived mCherry was observed in tachyzoites of all strains (Fig. 4B). However, we  
203 found that whereas 33% of  $P\Delta cpl$  and 38%  $P\Delta crt\Delta cpl$  tachyzoites accumulated host-  
204 derived mCherry,  $P\Delta crt$  showed only 3% mCherry positive tachyzoites, which is  
205 comparable to the parental and complement lines (Fig. 4C). Accumulation of mCherry in  
206  $P\Delta crt\Delta cpl$  parasites was not significantly different than that of  $P\Delta cpl$ . Taken together, these  
207 findings suggest that TgCRT is not required for the delivery or digestion of host-derived  
208 protein in the VAC of tachyzoites.

209  
210 We next wanted to determine whether TgCRT deficiency affects VAC digestion in  
211 bradyzoites. Since it has not yet been shown whether bradyzoites are capable of ingesting  
212 host cytosolic material akin to tachyzoites, we instead employed a ‘puncta’ assay to initially  
213 assess VAC digestion in bradyzoites. This assay is based on a previous report showing  
214 that disruption of VAC proteolysis with the TgCPL inhibitor LHVS leads to the accumulation  
215 of undigested material in the VAC, which is visible by phase contrast microscopy as dark

216 puncta (13). We found that  $P\Delta crt$  cysts treated with LHVS developed dark puncta and that  
217 this corresponded with loss of the translucent VAC (Fig. 5A and B). As expected, there  
218 was an increase in dark puncta of parental and complement LHVS treated cysts as well.  
219 However,  $P\Delta crt$  cysts contain larger dark puncta in both DMSO and LHVS treated samples  
220 than in the parental and complement cysts (Fig. 5B). Also, although  $P\Delta crt$  bradyzoites did  
221 not show an increase in the total number of puncta (Fig. 5C), the percentage of total cyst  
222 area occupied by puncta was increased with LHVS treatment (Fig. 5D). Together these  
223 findings suggest that  $P\Delta crt$  bradyzoites have larger puncta as an indicator of undigested  
224 material; however, whether this is a result of moderately impaired proteolytic digestion  
225 within the VAC or the intrinsically larger size of  $P\Delta crt$  VAC is unclear.

226

227 The dark puncta observed within LHVS-treated bradyzoite cysts have been shown to co-  
228 localize with TgCPL and *T. gondii* autophagy-related protein 8 (TgAtg8), suggesting that  
229 some of the undigested material found within the bradyzoite VAC is derived from  
230 autophagy (13). To interrogate whether TgCRT deficiency affects the production or  
231 turnover of parasite autophagosomes, we created a  $P\Delta crt$  strain that ectopically expresses  
232 tdTomato-TgAtg8 (Fig. S2), as done previously for Pru (13). Abundance of tdTomato-  
233 TgAtg8 in DMSO treated bradyzoites is a function of autophagosomal production and  
234 turnover. By contrast, tdTomato-TgAtg8 abundance in LHVS treated bradyzoites is a  
235 function of autophagosomal production exclusively since turnover is blocked. Pru- and  
236  $P\Delta crt$  tdTomato-TgAtg8 cysts treated with DMSO or LHVS for 1 or 3 days were assessed  
237 for tdTomato-TgAtg8 intensity both within cysts and in isolated bradyzoites. We also  
238 measured the total area of tdTomato-TgAtg8 puncta within cysts. For the DMSO control,  
239 no significant differences were seen between Pru and  $P\Delta crt$  parasites for tdTomato-

240 TgAtg8 intensity in intact cysts (Fig. 6A & B) or isolated bradyzoites (Fig. 6C), suggesting  
241 no change in the balance of autophagosome production and turnover. DMSO treated  $P\Delta crt$   
242 bradyzoites showed a modest, but significant, increase in tdTomato-TgAtg8 puncta size  
243 (Fig. 6D), potentially due to tdTomato-TgAtg8 association with the enlarged VAC in such  
244 parasites. Upon inhibition of VAC proteolysis with LHVS, tdTomato-TgAtg8 intensity and  
245 size increased progressively for both Pru and  $P\Delta crt$  bradyzoites. However, accumulation of  
246 tdTomato-TgAtg8 in  $P\Delta crt$  bradyzoites was delayed and somewhat muted compared to  
247 Pru. Taken together, these data suggest that the balance of autophagosome production  
248 and turnover is unchanged in  $P\Delta crt$ , but that TgCRT deficiency is associated an overall  
249 lower rate of autophagosome production.

250

251 **TgCRT transport function is linked to VAC proteolysis.** Malaria parasites bearing  
252 chloroquine resistance mutations in PfCRT display an enlarged digestive vacuole and they  
253 accumulate small peptides derived from hemoglobin (20, 21). This combined with other  
254 work showing that recombinant PfCRT transports amino acids, small peptides, and  
255 chloroquine (17) suggests that PfCRT functions to transport products of hemoglobin  
256 digestion out of the digestive vacuole. More recently, TgCRT was also shown to transport  
257 chloroquine upon heterologous expression in yeast (18). It is therefore plausible that  
258 TgCRT is also able to transport amino acids and small peptides out of the VAC. If TgCRT  
259 plays a similar role and the swelling of the VAC in  $P\Delta crt$  parasites is due to a buildup of  
260 TgCRT substrates derived from protein digestion, then reducing the production of digestion  
261 products by inhibiting TgCPL should prevent or reverse VAC enlargement.

262

263 To test this, we differentiated  $P\Delta crt$  bradyzoites 7 days before adding LHVS for another 2  
264 days under differentiation conditions. This treatment window was chosen because our  
265 earlier results showed that 3 days of LHVS treatment results in larger dark and Atg8  
266 puncta areas (Fig. 5B & 6D), whereas a 1 day treatment appeared to have no notable  
267 effect on Atg8 intensity (Fig. 5B & C). We reasoned that with 2 days of treatment, we  
268 should begin seeing an effect of LHVS treatment on VAC size prior to excessive  
269 accumulation of undigested protein. Although some enlarged VACs were apparent in  
270 LHVS treated  $P\Delta crt$  bradyzoites (Fig. 7A), quantification revealed a significant restoration  
271 of VAC size upon LHVS treatment (Fig. 7B). Also, undigested material accumulated within  
272 the VAC of  $P\Delta crt$  bradyzoites treated with LHVS, suggesting that TgCPL is active in  $P\Delta crt$   
273 bradyzoites.

274  
275 To validate a link between TgCRT transport function and VAC proteolysis, we compared  
276 the size and appearance of the VAC in  $P\Delta crt$  bradyzoites with that of Pru or  $P\Delta crt\Delta cpl$   
277 parasites. We found that after 4 or 7 days of conversion to bradyzoite cysts,  $P\Delta crt\Delta cpl$   
278 bradyzoites have visually smaller VACs full of electron-dense, undigested material  
279 compared to the markedly enlarged, more electron-lucent VACs of  $P\Delta crt$  bradyzoites (Fig.  
280 7C). Quantification revealed VAC size of  $P\Delta crt\Delta cpl$  strains to be significantly smaller than  
281  $P\Delta crt$  VACs at both time points (Fig. 7D). These findings indicate that by genetically  
282 limiting proteolysis in the VAC, the gross enlargement of the VAC observed in  $P\Delta crt$   
283 bradyzoites is prevented. In addition, whereas approximately 20%  $P\Delta crt$  cysts were dead  
284 or dying at both 4 and 7 days post-conversion, 75% of  $P\Delta crt\Delta cpl$  cysts were degenerate at  
285 4 days and 100% were degenerate at 7 days post-conversion. Thus, parasite lacking both  
286 TgCRT and TgCPL appear to be more severely compromised than those lacking TgCRT

287 alone. Taken together, our findings suggest a link between TgCRT and protein digestion in  
288 a manner that is consistent with TgCRT acting as an exporter of degradation products  
289 generated by VAC proteases in bradyzoites.

290

## 291 **DISCUSSION**

292 Herein we show that TgCRT is necessary for maintaining the size of the VAC and the  
293 viability of *T. gondii* bradyzoites, possibly by functioning as a transporter of digested  
294 material from the VAC to the parasite cytosol. Together with other recent studies reporting  
295 that VAC protein digestion is crucial for bradyzoite viability (13), our findings point toward  
296 the VAC as an important organelle for *T. gondii* bradyzoite persistence and uncover  
297 TgCRT as a potential target for chronic *T. gondii* infection.

298

299 Our finding that deletion of TgCRT in a type II strain ( $P\Delta crt$ ) resulted in enlargement of the  
300 VAC is in line with previous studies that have knocked down (15) or knocked out (18)  
301 TgCRT in a type I strain (RH). We also show that this enlarged VAC phenotype is  
302 consistent across life stages and that it appears to be especially prominent in bradyzoites.  
303 Our EM measurements suggest that the VAC occupies one third of the cytoplasm of  $P\Delta crt$   
304 bradyzoites, thus becoming easily visible by phase contract microscopy in many parasites.  
305 VAC enlargement was fully reversed upon re-expression of TgCRT, firmly establishing that  
306 TgCRT expression is necessary to maintain normal VAC morphology.

307

308 The underlying basis for enlargement of the VAC in TgCRT deficient parasites is unknown,  
309 but may be linked to endolysosomal system dynamics and the transporter function of  
310 TgCRT. The VAC is a dynamic organelle that undergoes rounds of fission to form smaller

311 structures late in the cell cycle before fusing to form typically a single compartment in G1  
312 phase (10, 22). The VAC probably also communicates via fusion and fission with the  
313 parasite endosome-like compartments (ELCs), based on partial colocalization of VAC and  
314 ELC markers in intracellular parasites (10, 18, 22). Interestingly, it was recently reported  
315 that replicating *PΔcrt* parasites maintain a single VAC that overlaps substantially with ELC  
316 markers (18). These findings imply that defects in VAC fragmentation and fission of the  
317 VAC from the ELCs result in sustaining a hybrid VAC/ELC compartment in parasites  
318 lacking TgCRT. Thus, contributions of membrane from both the VAC and ELCs could  
319 account for enlargement of the VAC in *PΔcrt* parasites. Although it is possible that TgCRT  
320 directly participates in vesicular fission, no evidence of this currently exists. On the other  
321 hand, it appears more likely that swelling of the VAC in TgCRT deficient parasites is  
322 related to TgCRT transport function. If, akin to PfCRT, TgCRT exports proteolytic digestion  
323 products from the VAC, accumulation of such products in the VAC of *PΔcrt* parasites could  
324 increase osmotic pressure within the organelle due to the influx of water through a VAC-  
325 localized aquaporin (22). Whether a build-up of osmotic pressure is a driver of VAC size in  
326 TgCRT deficient parasites and is thereby responsible for defective VAC fragmentation and  
327 VAC/ELC resolution awaits further study.

328  
329 A knockout of *Plasmodium* CRT has not been reported, presumably because of it having  
330 an essential function. Nevertheless, chloroquine resistant strains bearing mutations in  
331 PfCRT also exhibit an enlarged digestive vacuole. Studies with recombinant PfCRT  
332 suggested that chloroquine resistant alleles tend to have lower transport activity for a  
333 model substrate (tetraethyl ammonium), but higher transport activity for chloroquine (17).  
334 Chloroquine resistant strains also accumulate small peptides derived from digestion of

335 hemoglobin (20, 21). Thus, the enlarged digestive vacuole of chloroquine resistant strains  
336 is potentially due to a partial loss of PfCRT native transport function. That PfCRT is  
337 essential whereas TgCRT is dispensable likely reflects the crucial role of the malaria  
338 digestive vacuole in detoxification of heme liberated from hemoglobin digestion during  
339 replication within erythrocytes.

340

341 Consistent with an important role for TgCRT in chronic infection, we observed a ~5-fold  
342 loss of viability for  $P\Delta crt$  bradyzoites *in vitro*. Loss of viability appears to increase with time  
343 of differentiation, suggesting a progressively important role for TgCRT in chronic infection.  
344 We also noted a 10-fold decrease in  $P\Delta crt$  brain cysts in mice. This decrease is likely a  
345 composite of effects occurring during the acute stage and the chronic stage. The trend  
346 toward lower initial infection of the brain observed for  $P\Delta crt$  parasites is in agreement with  
347 the decreased virulence reported during acute infection of  $RH\Delta crt$  parasites (18). However,  
348 the lower initial infection of the brain does not appear to fully account for the striking  
349 decrease in  $P\Delta crt$  brain cysts. Additional loss of  $P\Delta crt$  cysts during the chronic infection of  
350 mice is consistent with our *in vitro* viability findings. Nevertheless, we found that cysts  
351 recovered from the brains of  $P\Delta crt$  infected mice contained infectious bradyzoites capable  
352 of establishing infection of naïve mice. Our observation of lower  $P\Delta crt$  cultivation efficiency  
353 from the brains of infected naïve mice is further evidence of a decreased brain burden  
354 and/or viability. Thus, whereas TgCRT is not absolutely required for *T. gondii* persistence,  
355 it nonetheless strongly influences the course and burden of chronic infection.

356

357 Proteolysis within the VAC is necessary for sustaining bradyzoite viability *in vitro* and *in*  
358 *vivo* (13). Genetically or chemically disrupting TgCPL activity results in a loss of bradyzoite

359 viability that is associated with accumulation of undigested material co-localizing with Atg8,  
360 a marker of autophagosomes. *P. falciparum* parasites administered protease inhibitors that  
361 target digestive vacuole proteinases also accumulate undigested material, in this case  
362 hemoglobin derived from the infected erythrocyte (20). However, the electron-lucent VACs  
363 observed in  $P\Delta crt$  parasites, along with the tachyzoite ingestion assay, dark puncta  
364 measurements, and Atg8 accumulation data suggests that digestion in  $P\Delta crt$  tachyzoites  
365 and bradyzoites is largely normal despite the striking morphological changes to the  
366 organelle. It was suggested that  $RH\Delta crt$  tachyzoites reduce the expression of several VAC  
367 proteases to decrease production of TgCRT substrates generated by VAC proteolysis,  
368 thereby easing osmotic pressure (18). If VAC proteolysis is similarly reduced in  $P\Delta crt$   
369 parasites, this does not appear to affect the digestion of host-derived protein in tachyzoites  
370 via the ingestion pathway or parasite-derived material delivered through autophagy.

371  
372 Consistent with TgCRT functioning as a transporter downstream of VAC proteolysis, we  
373 found that treating  $P\Delta crt$  bradyzoites with LHVS restored VAC size prior to subsequent  
374 accumulation of undigested material. This was observed in the EM images with 2 days of  
375 LHVS treatment, where VACs are smaller and a buildup of undigested material is  
376 beginning to show. We also found that  $P\Delta crt\Delta cpl$  double knockout bradyzoites have a  
377 normal sized VAC, confirming that protein digestion in the VAC is required for expansion of  
378 the VAC in TgCRT deficient parasites. The accumulation of undigested material in LHVS  
379 treated  $P\Delta crt$  and  $P\Delta crt\Delta cpl$  is consistent with delivery of proteolytic substrates to the VAC  
380 TgCRT deficient bradyzoites. Nevertheless, we noted a delay in the accumulation of the  
381 autophagic marker TgAtg8 in  $P\Delta crt$  bradyzoites after blocking TgCPL activity with LHVS,  
382 suggesting a decrease in the production of autophagosomes. Whether this is a result of a



383 feedback loop to reduce delivery of substrates to the VAC akin to the down-regulation of  
384 proteases in TgCRT deficient tachyzoites (18) or a due to a general decline in the health of  
385  $P\Delta crt$  bradyzoites remains unclear. It should also be noted that although we were unable  
386 to introduce tdTomato-TgAtg8 into  $P\Delta crt:CRT$  parasites due to a lack of available  
387 selectable markers, all of the other phenotypes measured in  $P\Delta crt$  parasites were restored  
388 upon genetic complementation.

389  
390 Previous work in TgCPL together with the current findings for TgCRT is consistent with a  
391 central role for the VAC in *T. gondii* persistence. Parasites deficient in TgCPL and TgCRT  
392 appear to be especially compromised, which is consistent with a functional link between  
393 these VAC components. Additional studies aimed at targeting these proteins and  
394 identifying new components of the VAC are needed to realize the potential of  
395 compromising this organelle for therapeutic gain.

396

397

## 398 **MATERIALS AND METHODS**

399 **Host cell and parasite cultures.** Human foreskin fibroblasts (HFFs) were grown in  
400 Dulbecco's Modified Eagle Medium (DMEM, Gibco) containing 10% cosmic calf (Gibco),  
401 50 µg/ml penicillin-streptomycin, 2 mM L-glutamine, and 10 mM HEPES. *T. gondii* strains  
402 used in this study were derived from PruS/Luc strain (13) maintained *in vitro* by serial  
403 passage on human foreskin fibroblast (HFF) monolayers as previously described (23).

404

405 **VAC staining.** Egressed tachyzoites from HFFs were filter-purified and pelleted at 1500xg  
406 for 10 min. Parasites were settled on Cell-Tak<sup>TM</sup> (Fisher Scientific) coated slides for 30

407 min, fixed in 4% formaldehyde, and stained for with Rb $\alpha$ TgCPL (1:500) and Gt $\alpha$ Rb 594  
408 secondary (1:1000).

409  
410 ***In vitro* conversion.** Tachyzoites were converted to bradyzoite cysts *in vitro* using  
411 previously published methods (24). In brief, tachyzoites were allowed to invade HFFs  
412 overnight under standard growing conditions. Infected cells were then grown in alkaline  
413 media (RPMI 1540 w/o NaHCO<sub>3</sub>, 50 mM HEPES, 3% FBS, Pen/Strep, pH 8.2) in an  
414 incubator without CO<sub>2</sub>, with media changed every day until samples were processed.

415  
416 **Transmission electron microscopy.** For ultrastructural observations of infected cells by  
417 thin-section, samples were fixed in 2.5% glutaraldehyde in 0.1 mM sodium cacodylate and  
418 processed as described (25). Ultra-thin sections of infected cells were stained with osmium  
419 tetraoxide before examination with Philips CM120 EM (Eindhoven, Netherlands) under 80  
420 kV.

421  
422 **qPCR/plaque assay for bradyzoite viability.** *In vitro* bradyzoite viability was assessed by  
423 plaque assays normalized to qPCR as previously described (13). Briefly, tachyzoites were  
424 converted to bradyzoite cysts for 7 and 14 days as described above. At these time points  
425 bradyzoites were harvested using pepsin treatment and added to HFF monolayers for 10  
426 days, after which time plaques were counted. Genomic DNA was extracted from an aliquot  
427 of samples using the Qiagen Blood and Tissue Kit and SYBR Green qPCR performed  
428 using the primer pairs listed in Table S1 and the following reaction conditions: 98°C, 2' [  
429 98°C, 5"; 68°C, 30", 72°C, 45"] x 45 cycles.

430

431 **GFP intensity** . After 1 and 2 weeks of tachyzoite conversion, as described above, *in vitro*  
432 cysts were fixed and stained with biotinylated dolichos (primary; 1:400; Vector  
433 Laboratories) and Streptavidin Alexa350 (secondary; 1:1000; Life Technologies). Image J  
434 was used to select dolichos stained cysts and quantify the amount of GFP coverage and  
435 intensity within the cyst. The dolichos signal was used to create a mask for further analysis  
436 by auto thresholding with the Li method (26). Analysis under these masks was redirected  
437 to the GFP channel, where particles between 130 – 2300  $\mu\text{m}^2$  and 0.30-1.00 circularity  
438 were analyzed.

439  
440 **tdTomato-Atg8 intensity and size**. After 1 week of tachyzoite conversion as described  
441 above, *in vitro* cysts were fixed and stained with biotinylated dolichos (primary; 1:400;  
442 Vector Laboratories) and Streptavidin Alexa350 (secondary; 1:1000; Life Technologies).  
443 ImageJ was used to select dolichos stained cysts and quantify the total intensity of  
444 tdTomato-Atg8 and the tdTomato-Atg8 puncta size within each cyst. Dolichos positive  
445 structures between 200-2000  $\mu\text{M}^2$  with a circularity of 0.40-1.00 were identified using the  
446 Minimum method of auto-thresholding. The resulting binary images were used to create  
447 masks under which Atg8 puncta were further analyzed. Td-Tomato Atg8 puncta were  
448 analyzed as being between 0.2-1.50  $\mu\text{M}^2$  with a circularity of 0.40-1.00 and were identified  
449 with the Phansalkar method of auto local thresholding with a radius of 15.

450  
451 **Tachyzoite plaque assay**. Intracellular tachyzoites were harvested following standard  
452 procedures, counted, and added to HFF monolayers in triplicate to quadruplicate wells.  
453 Parasites were left undisturbed for 10 days, after which time plaques were counted.

454

455 **Mouse seropositivity.** *Toxoplasma* IgG was measured using enzyme linked  
456 immunosorbent assay (ELISA) to determine infectivity. In brief, *Toxoplasma* lysate was  
457 made from freshly lysed Pru tachyzoites that was sonicated in 1 ug/mL Leupeptin, 1 ug/mL  
458 E64, TPCK, and 10 ug/mL A-PMSF. Plates were coated with 10 ng of antigen in coating  
459 buffer (Na<sub>2</sub>CO<sub>3</sub>, NaHCO<sub>3</sub>, pH 9.6) overnight, blocked in 3% gelatin/PBS-T, serum was  
460 added in a 1:25 dilution in 1% gelatin/PBS-T and incubated for 1 hr at RT. Secondary  
461 HRP-conjugated GtαMs (1:1000) was added for 1 hr. Substrate was added for color  
462 development, which was stopped with H<sub>2</sub>SO<sub>4</sub>. Absorbance was read at 400 nm.

463  
464 **Tachyzoite ingestion assay.** Tachyzoite digestion was determined using the ingestion  
465 assay as previously described (12). In brief, inducible mCherry Chinese hamster ovary  
466 (CHO) cells were plated and induced with 2 μg/mL of doxycycline for 5 days. Tachyzoites  
467 were harvested from HFF cells and allowed to invade induced-CHO cells for 4 hrs.  
468 Tachyzoites were then mechanically lysed out of host cells, purified, treated with pronase  
469 and saponin, and imaged on Cell-Tak™ (Fisher Scientific) coated slides. Samples were  
470 coded at the time of initial harvesting. For each biological replicate, more than 200  
471 tachyzoites of each genotype were analyzed for host-derived mCherry accumulation within  
472 parasites.

473  
474 **Western blotting.** Tachyzoite lysates were prepared from purified parasites with the  
475 addition of boiled 1x sample buffer, and lysate from 3x10<sup>5</sup> tachyzoites/10 μL sample buffer  
476 was loaded onto 10% SDS polyacrylamide gels. Blots were probed with antibody to TgCPL  
477 (Rb; 1:300) (10) and α-tubulin (Ms; 1:1000; Developmental Studies Hybridoma Bank,  
478 University of Iowa) for the loading control.

479

480 **Puncta measurements in LHVS treated parasites.** Tachyzoites were converted to  
481 bradyzoite cysts as described above. After 7 days of conversion, parasites were treated  
482 with 1  $\mu\text{M}$  LHVS or DMSO (control) every day for 3 days. Cells were then fixed and stained  
483 with biotinylated dolichos lectin (primary; 1:400; Vector Laboratories) and Streptavidin  
484 Alexa350 (secondary; 1:1000; Life Technologies). Image J was used to select dolichos  
485 stained cysts and quantify the number and size of puncta within the cyst. Images were  
486 automatically thresholded using the MaxEntropy method to create a binary image (27).  
487 Noise was reduced by opening the image with 6 iterations of one pixel. Masks were  
488 created by using the Analyze Particle function, with objects between 130 – 1900  $\mu\text{m}^2$ , and  
489 a circularity of 0.30-1.00 begin called a cyst. Under these masks, dark puncta were  
490 analyzed in the following way: phase images were Gaussian blurred with a sigma of 2, and  
491 then auto-local thresholding was performed using the Phansalkar method (28) with a  
492 radius of 5 pixels. Objects with an area of 0.20 – 6.00  $\mu\text{m}^2$  and a circularity of 0.50 – 1.00  
493 were analyzed as dark puncta.

494

495 ***In vitro* differentiation kinetics.** Tachyzoites were converted to bradyzoite cysts as  
496 described above. Parasites were fixed at 1, 2, 3, and 4 days post-conversion and stained  
497 for BAG1 (Rb $\alpha$ BAG1, 1:1000), a late marker for bradyzoites. These parasites express  
498 GFP under the LDH2 promoter, an early marker of bradyzoites. Image J was used to  
499 analyze the BAG1 and GFP coverage of each vacuole. Vacuoles were manually identified  
500 using phase images by drawing an ROI with the freehand tool. The ROIs were then  
501 applied to other channels for analysis as follows. The GFP and Texas Red channels were  
502 auto-thresholded using optimal thresholding methods for each day of conversion. The non-

503 thresholded and thresholded ROIs were measured for pixel intensity and used to  
504 determine overall and percent intensity for GFP and Texas Red. Vacuoles with over 50%  
505 coverage were designated as being cysts, and the total percentage of GFP and BAG1  
506 positive cysts was calculated independently.

507

508 **In vivo cyst burden.** C57BL/6J female mice (7-8 wks old, Jackson Laboratories, Bar  
509 Harbor, ME) were used in this study. Mice were injected intra-peritoneum (i.p.) with purified  
510  $10^5$  tachyzoites of either PruS/Luc (Pru), Pru $\Delta$ crt (P $\Delta$ crt), or Pru $\Delta$ crt:CRT (P $\Delta$ crt:CRT) in  
511 200  $\mu$ L of 1x phosphate-buffered saline (PBS). At 4 weeks post-infection (wpi) mice were  
512 sacrificed following university-approved protocols. Brains were harvested and  
513 homogenized in 1 mL ice-cold PBS via syringing through a 20-gauge needle. Mice were  
514 coded and cysts were enumerated in 90  $\mu$ L of brain homogenate (9% of the brain) and the  
515 total brain cyst number calculated. Cyst burden data were pooled from 2 independent  
516 experiments.

517

518 **In vivo parasite burden kinetics.** The same inoculation conditions as described for *in*  
519 *vivo* cyst burden was used. At 7 and 10 days post-infection (dpi) mice were sacrificed and  
520 brains harvested. Brains were homogenized in ice-cold PBS to have 50 ng homogenate/ $\mu$ L  
521 PBS. gDNA was extracted from 50  $\mu$ L of homogenate using the DNeasy Blood and Tissue  
522 Kit (Qiagen). qPCR was performed in triplicate for each sample with the following cycling  
523 conditions: 90°C, 2'; [98°C, 10"; 56°C, 20"; 72°C, 20"]x45 using SSO Advanced SYBR  
524 Green Supermix (BioRad), and 300 nM Tox9 and 11 primers listed in Table S1. *T. gondii*  
525 standards of specified parasite numbers (1 –  $10^5$  genomes/ $\mu$ L) were used to quantify  
526 parasite brain burden.

527

528 ***In vivo* cyst viability.** To determine the viability of *T. gondii* cysts procured from the *in vivo*  
529 cyst burden experiment, 5 and 30 brain cysts of Pru, P $\Delta$ crt, or P $\Delta$ crt:CRT were injected i.p.  
530 into C57BL/6J female mice (7-8 weeks old). Mice inoculated with an equivalent amount of  
531 uninfected mouse brain homogenate were used as a negative control for infection. At 3 wpi  
532 mice were coded and sacrificed. Serum and brain was collected as described above for  
533 the *in vivo* cyst burden. Half of each brain homogenate was added to confluent HFF cells  
534 and monitored for parasite growth for 4.5 weeks.

535

536 **Flow cytometry.** Parasites were fixed with 4% formaldehyde for 15 min at room  
537 temperature, washed one time with PBS and resuspended in PBS for analysis on a LSR  
538 Fortessa flow cytometer (BD Biosciences, San Jose, CA, USA) with BD FACSDiVa™  
539 Software (BD Biosciences). Data were analyzed with FlowJo (BD Biosciences) using the  
540 following gating: FITC-positive parasites were characterized as bradyzoites; then, the  
541 amount of tdTomato-ATG8 in bradyzoites was determined by the 561 nm signal.

542

543 **Statistics.** Data was analyzed using GraphPad prism. For each data set, outliers were  
544 identified and removed using ROUT with Q=0.1%. Data was then tested for normality and  
545 equal variance. If passed, One-way ANOVA with Tukey's multiple comparisons was  
546 performed. If failed, Mann-Whitney U test or Kruskal-Wallis with Dunn's multiple  
547 comparison was performed.

548

549 **ACKNOWLEDGEMENTS**

550 This work was support by National Institutes of health grants R01AI060767 (to I.C.) and  
551 R01AI120627 (to V.B.C. and M.D.C.) and a grant from the Stanley Medical Research  
552 Institute (to V.B.C.).

553

554 We thank the excellent technical staff of the Electron Microscopy Core Facility at the Johns  
555 Hopkins University School of Medicine Microscopy Facility. We also thank Professor Carla  
556 Emiliani for helpful discussions and support. We appreciate the technical assistance of  
557 Drs. Abimbola Kolawole and Carmen Mirabelli with flow cytometry.

558

## 559 REFERENCES

- 560 1. Commodaro AG, Belfort RN, Rizzo LV, Muccioli C, Silveira C, Burnier MN, Jr.,  
561 Belfort R, Jr. 2009. Ocular toxoplasmosis: an update and review of the literature.  
562 Mem Inst Oswaldo Cruz 104:345-50.
- 563 2. Khan K, Khan W. 2018. Congenital toxoplasmosis: An overview of the neurological  
564 and ocular manifestations. Parasitol Int 67:715-721.
- 565 3. Ozgonul C, Besirli CG. 2017. Recent Developments in the Diagnosis and Treatment  
566 of Ocular Toxoplasmosis. Ophthalmic Res 57:1-12.
- 567 4. Winstanley P. 1995. Drug treatment of toxoplasmic encephalitis in acquired  
568 immunodeficiency syndrome. Postgrad Med J 71:404-8.
- 569 5. Torrey EF, Bartko JJ, Lun ZR, Yolken RH. 2007. Antibodies to *Toxoplasma gondii* in  
570 patients with schizophrenia: a meta-analysis. Schizophr Bull 33:729-36.
- 571 6. Okusaga O, Langenberg P, Sleemi A, Vaswani D, Giegling I, Hartmann AM, Konte  
572 B, Friedl M, Groer MW, Yolken RH, Rujescu D, Postolache TT. 2011. *Toxoplasma*



- 573 gondii antibody titers and history of suicide attempts in patients with schizophrenia.  
574 Schizophr Res 133:150-5.
- 575 7. Xiao J, Prandovszky E, Kannan G, Pletnikov MV, Dickerson F, Severance EG,  
576 Yolken RH. 2018. Toxoplasma gondii: Biological Parameters of the Connection to  
577 Schizophrenia. Schizophr Bull 44:983-992.
- 578 8. Tyebji S, Seizova S, Hannan AJ, Tonkin CJ. 2018. Toxoplasmosis: A pathway to  
579 neuropsychiatric disorders. Neurosci Biobehav Rev 96:72-92.
- 580 9. Montoya JG, Liesenfeld O. 2004. Toxoplasmosis. Lancet 363:1965-76.
- 581 10. Parussini F, Coppens I, Shah PP, Diamond SL, Carruthers VB. 2010. Cathepsin L  
582 occupies a vacuolar compartment and is a protein maturase within the  
583 endo/exocytic system of Toxoplasma gondii. Mol Microbiol 76:1340-57.
- 584 11. Dou Z, McGovern OL, Di Cristina M, Carruthers VB. 2014. Toxoplasma gondii  
585 ingests and digests host cytosolic proteins. MBio 5:e01188-14.
- 586 12. McGovern OL, Rivera-Cuevas Y, Kannan G, Narwold AJ, Jr., Carruthers VB. 2018.  
587 Intersection of endocytic and exocytic systems in Toxoplasma gondii. Traffic  
588 19:336-353.
- 589 13. Di Cristina M, Dou Z, Lunghi M, Kannan G, Huynh MH, McGovern OL, Schultz TL,  
590 Schultz AJ, Miller AJ, Hayes BM, van der Linden W, Emiliani C, Bogyo M, Besteiro  
591 S, Coppens I, Carruthers VB. 2017. Toxoplasma depends on lysosomal  
592 consumption of autophagosomes for persistent infection. Nat Microbiol 2:17096.
- 593 14. Larson ET, Parussini F, Huynh MH, Giebel JD, Kelley AM, Zhang L, Bogyo M,  
594 Merritt EA, Carruthers VB. 2009. Toxoplasma gondii cathepsin L is the primary  
595 target of the invasion-inhibitory compound morpholinurea-leucyl-homophenyl-vinyl  
596 sulfone phenyl. J Biol Chem 284:26839-50.

- 597 15. Warring SD, Dou Z, Carruthers VB, McFadden GI, van Dooren GG. 2014.  
598 Characterization of the chloroquine resistance transporter homologue in  
599 *Toxoplasma gondii*. *Eukaryot Cell* 13:1360-70.
- 600 16. Maughan SC, Pasternak M, Cairns N, Kiddle G, Brach T, Jarvis R, Haas F,  
601 Nieuwland J, Lim B, Muller C, Salcedo-Sora E, Kruse C, Orsel M, Hell R, Miller AJ,  
602 Bray P, Foyer CH, Murray JA, Meyer AJ, Cobbett CS. 2010. Plant homologs of the  
603 *Plasmodium falciparum* chloroquine-resistance transporter, PfCRT, are required for  
604 glutathione homeostasis and stress responses. *Proc Natl Acad Sci U S A* 107:2331-  
605 6.
- 606 17. Juge N, Moriyama S, Miyaji T, Kawakami M, Iwai H, Fukui T, Nelson N, Omote H,  
607 Moriyama Y. 2015. *Plasmodium falciparum* chloroquine resistance transporter is a  
608 H<sup>+</sup>-coupled polyspecific nutrient and drug exporter. *Proc Natl Acad Sci U S A*  
609 112:3356-61.
- 610 18. Thornton LB, Teehan P, Floyd K, Cochrane C, Bergmann A, Dou Z. 2018. The  
611 ortholog of chloroquine resistance transporter (TgCRT) plays a key role in  
612 maintaining the integrity of the endolysosomal system in *Toxoplasma gondii* to  
613 facilitate host invasion. *bioRxiv* doi:10.1101/409904:409904.
- 614 19. Fox BA, Falla A, Rommereim LM, Tomita T, Gigley JP, Mercier C, Cesbron-Delauw  
615 MF, Weiss LM, Bzik DJ. 2011. Type II *Toxoplasma gondii* KU80 knockout strains  
616 enable functional analysis of genes required for cyst development and latent  
617 infection. *Eukaryot Cell* 10:1193-206.
- 618 20. Rosenthal PJ, McKerrow JH, Aikawa M, Nagasawa H, Leech JH. 1988. A malarial  
619 cysteine proteinase is necessary for hemoglobin degradation by *Plasmodium*  
620 *falciparum*. *J Clin Invest* 82:1560-6.

- 621 21. Pulcini S, Staines HM, Lee AH, Shafik SH, Bouyer G, Moore CM, Daley DA, Hoke  
622 MJ, Altenhofen LM, Painter HJ, Mu J, Ferguson DJ, Llinas M, Martin RE, Fidock  
623 DA, Cooper RA, Krishna S. 2015. Mutations in the Plasmodium falciparum  
624 chloroquine resistance transporter, PfCRT, enlarge the parasite's food vacuole and  
625 alter drug sensitivities. *Sci Rep* 5:14552.
- 626 22. Miranda K, Pace DA, Cintron R, Rodrigues JC, Fang J, Smith A, Rohloff P, Coelho  
627 E, de Haas F, de Souza W, Coppens I, Sibley LD, Moreno SN. 2010.  
628 Characterization of a novel organelle in *Toxoplasma gondii* with similar composition  
629 and function to the plant vacuole. *Mol Microbiol* 76:1358-75.
- 630 23. Di Cristina M, Ghouze F, Kocken CH, Naitza S, Cellini P, Soldati D, Thomas AW,  
631 Crisanti A. 1999. Transformed *Toxoplasma gondii* tachyzoites expressing the  
632 circumsporozoite protein of *Plasmodium knowlesi* elicit a specific immune response  
633 in rhesus monkeys. *Infect Immun* 67:1677-82.
- 634 24. Lunghi M, Galizi R, Magini A, Carruthers VB, Di Cristina M. 2015. Expression of the  
635 glycolytic enzymes enolase and lactate dehydrogenase during the early phase of  
636 *Toxoplasma* differentiation is regulated by an intron retention mechanism. *Mol*  
637 *Microbiol* 96:1159-75.
- 638 25. Coppens I, Joiner KA. 2003. Host but not parasite cholesterol controls *Toxoplasma*  
639 cell entry by modulating organelle discharge. *Mol Biol Cell* 14:3804-20.
- 640 26. Li CH, Tam PKS. 1998. An iterative algorithm for minimum cross entropy  
641 thresholding. *Pattern Recognition Letters* 19:771-776.
- 642 27. Kapur JN, Sahoo PK, Wong AKC. 1985. A new method for gray-level picture  
643 thresholding using the entropy of the histogram. *Computer Vision, Graphics, and*  
644 *Image Processing* 29:273-285.

645 28. Phansalkar N, More S, Sabale A, Joshi MS. 2011. Adaptive local thresholding for  
646 detection of nuclei in diversity stained cytology images. International Conference on  
647 Communications and Signal Processing doi:10.1109/ICCSP.2011.5739305:218-  
648 220.

649

## 650 **FIGURE LEGENDS**

### 651 **Figure 1. $P\Delta crt$ tachyzoites and bradyzoites exhibit a distended VAC.**

652 A. Extracellular tachyzoites stained for the VAC protease TgCPL (red). Scale bar  
653 denotes 1  $\mu$ M. Arrow denotes distended VAC.

654 B. Extracellular bradyzoites purified from *in vitro* cysts differentiated for 1 week and  
655 stained for TgCPL (red). Scale bar denotes 1  $\mu$ M. Arrow denotes distended VAC.

656 C. Intracellular bradyzoite cysts differentiated *in vitro* for 1 week. Scale bar denotes 10  
657  $\mu$ M. Arrow denotes distended VAC.

658 D. Electron micrographs of intracellular bradyzoite cysts cultured *in vitro* for 1 week.  
659 Images within white boxes were expanded for the insets shown in the second row.  
660 Scale bars represent 500 nm for low magnification images and 200 nm for insets. P  
661 denotes the parasite.

662 E. Quantification of VAC size from electron micrographs. The following number of  
663 VACs were measured for each strain: Pru (13),  $P\Delta crt$  (25),  $P\Delta crt:CRT$  (15). Volume  
664 fraction corresponds to the area of the VAC/area of the parasite x 100. Bar is mean  
665 +/- SD. One-way ANOVA with Tukey's multiple comparisons was performed. \*\*\*\*  
666 denotes  $p < 0.0001$ .

667

### 668 **Figure 2. Deletion of CRT affects *in vitro* bradyzoite viability.**

- 669 A. Fluorescent images of bradyzoite cysts expressing GFP under the early bradyzoite  
670 LDH2 promoter after 1 and 2 weeks of *in vitro* differentiation. Scale bars denote 10  
671  $\mu$ M.
- 672 B. GFP intensity after 1 and 2 weeks of *in vitro* differentiation. Line represents mean  
673 +/- S.D. of bradyzoite cysts in 3 independent experiments. The following number of  
674 cysts were analyzed for each experiment for week 1: Pru (77, 54, 142), P $\Delta$ crt (54,  
675 91, 148), P $\Delta$ crt:CRT (96, 92, 88) and for week 2: Pru (106, 124, 102), P $\Delta$ crt (56,  
676 131, 94), P $\Delta$ crt:CRT (89, 107, 102). Kruskal Wallis with Dunn's multiple  
677 comparisons was performed. \*\*\*\* denotes  $p < 0.0001$ .
- 678 C. Viability of bradyzoites after 1 and 2 weeks of *in vitro* differentiation based on  
679 plaque numbers normalized to qPCR quantification. Line represents mean +/- S.D.  
680 of 3-4 technical replicates in 4-5 independent experiments. The following number of  
681 technical replicates were analyzed for each experiment for week 1: Pru (3, 3, 3, 4,  
682 4), P $\Delta$ crt (3, 3, 3, 4, 4), P $\Delta$ crt:CRT (3, 3, 3, 4) and for week 2: Pru (3, 3, 3, 4, 4),  
683 P $\Delta$ crt (3, 3, 3, 4, 4), P $\Delta$ crt:CRT (3, 3, 3, 4, 4). Kruskal Wallis with Dunn's multiple  
684 comparisons was performed. \*\*\*\* denotes  $p < 0.0001$  and \* denotes  $p < 0.05$ .

685

686 **Figure 3. Deletion of TgCRT affects *in vivo* bradyzoite burden.**

- 687 A. Brain cyst burden in mice at 4 weeks post-infection with *T. gondii*. Line represents  
688 mean +/- S.D. of mice from 2 independent experiments. The total number of mice  
689 analyzed were: Pru (12), P $\Delta$ crt (10), P $\Delta$ crt:CRT (15). Kruskal-Wallis with Dunn's  
690 multiple comparisons was performed. \*\*\* denotes  $p = 0.0002$  and \*\* denotes  $p =$   
691 0.0098.

- 692 B. *T. gondii* IgG of mice infected in panel A. Age and sex-matched uninfected mice  
693 used as IgG negative control. One-way ANOVA with Holm-Sidak's multiple  
694 comparisons was performed. \*\*\*\* denotes  $p < 0.0001$ , \*\*\* denotes  $p = 0.0002$ , \*\*  
695 denotes  $p = 0.002$ .
- 696 C. Brain parasite burden at 7 and 10 dpi. Line is mean +/- S.D. of mice from 2  
697 independent experiments. Kruskal-Wallis with Dunn's multiple comparisons was  
698 performed. The following is the number of mice analyzed for 7 and 10 dpi  
699 respectively: Pru (10,11),  $P\Delta crt$  (10,10),  $P\Delta crt:CRT$  (9,10). \*\* denotes  $p = 0.005$ , \*  
700 denotes  $p = 0.017$ .
- 701 D. *T. gondii* IgG levels in mice administered residual brain cysts (5 or 30 cysts). Data is  
702 from 1 experiment. Line is mean and dotted line is 2 SD above the mean of mice  
703 given uninfected brain homogenate. Open symbols denote mice administered 5  
704 parasite cysts and closed symbols denote mice administered 30 parasite cysts. Red  
705 symbols denote no parasite growth from brain homogenate. The following is the  
706 total number of mice analyzed: Uninfected mice (4), Pru (6),  $P\Delta crt$  (6),  $P\Delta crt:CRT$   
707 (6).

708

709 **Figure 4. VAC digestive function is not altered in  $P\Delta crt$  tachyzoites.**

- 710 A. Western blot of tachyzoite lysates probed for TgCPL (~30 kDa) and  $\alpha$ -Tubulin (~55  
711 kDa) as loading control.
- 712 B. Representative images of tachyzoites with ingested host-derived mCherry in red.  
713 Scale bar denotes 1  $\mu$ M.
- 714 C. Tachyzoite ingestion/digestion assay quantification from panel B. Lines represent  
715 the mean +/- SD of 3-4 experiments. The following numbers of tachyzoites were

716 enumerated for each experiment: Pru (234, 370, 280),  $P\Delta crt$  (297, 258, 290, 241),  
717  $P\Delta crt:CRT$  (235, 282, 239, 466),  $P\Delta crt\Delta cpl$  (268, 211, 270),  $P\Delta cpl$  (426, 384, 275).  
718 One-way ANOVA with Holm-Sidak's Multiple Comparisons was performed. \*\*\*\*  
719 denotes  $p < 0.0001$ .

720

721 **Figure 5. VAC digestive function is not altered in  $P\Delta crt$  bradyzoites**

- 722 A. Representative images of bradyzoite cysts cultured *in vitro* for 7 days and then  
723 treated with DMSO as a vehicle control or 1  $\mu$ M LHVS for 3 days. Dark puncta are  
724 clearly seen in LHVS treated cysts. Scale bar represents 5  $\mu$ M and scale bar of  
725 inset represents 1  $\mu$ M.
- 726 B. Measurement of dark puncta area within cysts from 2-3 independent experiments.  
727 Lines represent mean  $\pm$  S.D. The following number of cysts were analyzed from  
728 each experiment: Pru DMSO (65, 68), Pru LHVS(66, 73),  $P\Delta crt$  DMSO(72, 59, 69),  
729  $P\Delta crt$  LHVS(109, 78, 70),  $P\Delta crt:CRT$  DMSO(115, 60, 105 ),  $P\Delta crt:CRT$  LHVS(77,  
730 56, 94). Kruskal Wallis with Dunn's multiple comparisons was performed. \*\*\*\*  
731 denotes  $p < 0.0001$ , \*\* denotes  $p < 0.01$ .
- 732 C. Total puncta number in cysts analyzed in B. Lines represent mean  $\pm$  S.D. The  
733 following number of cysts were analyzed from each experiment: Pru DMSO (63,  
734 64), Pru LHVS(63, 69),  $P\Delta crt$  DMSO(70, 58, 66),  $P\Delta crt$  LHVS(107, 74, 65),  
735  $P\Delta crt:CRT$  DMSO(112, 58, 106 ),  $P\Delta crt:CRT$  LHVS(73, 56, 87). Kruskal Wallis with  
736 Dunn's multiple comparisons was performed.
- 737 D. Percent puncta coverage for each cyst analyzed in B. Lines represent mean  $\pm$   
738 S.D. Pru DMSO (65, 68), Pru LHVS(67, 73),  $P\Delta crt$  DMSO(72, 59, 69),  $P\Delta crt$   
739 LHVS(109, 78, 70),  $P\Delta crt:CRT$  DMSO(113, 60, 106 ),  $P\Delta crt:CRT$  LHVS(77, 56, 94).

740 Kruskal Wallis with Dunn's multiple comparisons was performed. \*\*\*\* denotes  
741  $p < 0.0001$ .

742

743 **Figure 6. Autophagy in PΔcrt bradyzoites.**

744 A. Representative images of Pru and PΔcrt Atg8-tdTomato expressing strains after 7  
745 days of conversion and treatment with DMSO or 1 μM LHVS for 1 or 3 days. Scale  
746 bar represents 10 μM.

747 B. Total tdTomato-TgAtg8 intensity within parasite cysts converted and treated as in A.  
748 Line represents mean +/- S.D. from 3-4 independent experiments. The following  
749 number of cysts were analyzed in each experiment: Pru DMSO (46, 50, 26), Pru  
750 LHVS 1 day (43, 47, 47, 16), Pru LHVS 3 day (45, 60, 31), PΔcrt DMSO (48, 54,  
751 30), PΔcrt LHVS 1 day (37, 39, 58, 28), PΔcrt LHVS 3 day (59, 47, 16). Kruskal  
752 Wallis with Dunn's multiple comparisons was performed. \*\*\*\* denotes  $p < 0.0001$ , \*\*  
753 denotes  $p < 0.01$ .

754 C. Atg8 intensity of bradyzoites analyzed by flow cytometry. Line represents mean +/-  
755 S.D. from 3-4 independent experiments. The following number of bradyzoites that  
756 were GFP and TdTomato positive were analyzed in each experiment: Pru DMSO  
757 (1122, 5330, 1534), Pru LHVS 1 day (493, 3199, 613), Pru LHVS 3 day (1960,  
758 5205, 2043), PΔcrt DMSO (620, 1115, 139), PΔcrt LHVS 1 day (623, 962, 230,  
759 1355), PΔcrt LHVS 3 day (1802, 2641, 337). One-way ANOVA with Sidak's  
760 multiple comparisons was performed. \*\*\* denotes  $p < 0.001$ , \*\* denotes  $p < 0.01$ , \*  
761 denotes  $p < 0.05$ .

762 D. tdTomato-TgAtg8 puncta size was measured for every puncta in each cyst. Line  
763 represents mean +/- S.D. from 3-4 independent experiments. The following number



764 of puncta were analyzed in each experiment: Pru DMSO (364, 290, 242), Pru LHVS  
765 1 day (617, 301, 1826, 1147), Pru LHVS 3 day (722, 697, 1518, 36), P $\Delta$ crt DMSO  
766 (406, 427, 330), P $\Delta$ crt LHVS 1 day (277, 233, 484, 324), P $\Delta$ crt LHVS 3 day (692,  
767 402, 633). Kruskal-Wallis with Dunn's multiple comparisons was performed. \*\*\*\*  
768 denotes  $p < 0.0001$ .

769

770 **Figure 7. VAC digestion disruption through CPL modulation affects P $\Delta$ crt bradyzoite**  
771 **VAC size and parasite health.**

772 A. Electron microscopy of *in vitro* bradyzoite cysts converted for 7 days and then  
773 treated with DMSO and 1  $\mu$ M LHVS for 2 days. Scale bars represent 500 nm.  
774 B. Quantification of VACs in panel A. Bars represent mean +/- S.D. The following  
775 numbers of VACs were measured for each strain: Pru (18), P $\Delta$ crt DMSO (49), P $\Delta$ crt  
776 LHVS (13). One-way ANOVA with Tukey's multiple comparisons was performed.  
777 \*\*\*\* denotes  $p < 0.0001$ , \* denotes  $p < 0.05$ .  
778 C. Representative electron micrograph images of *in vitro* bradyzoite cysts converted  
779 for 4 day and 7 days. Scale bars represent 500 nm. P denotes parasite.  
780 D. Quantification of VACs in panel C. Bars represent mean +/- S.D. The following  
781 number of VACs were measured for each strain: 4 day Pru (16), P $\Delta$ crt (17),  
782 P $\Delta$ crt $\Delta$ cpl (17). 7 day Pru (13), P $\Delta$ crt (25), P $\Delta$ crt $\Delta$ cpl (35). One-way ANOVA with  
783 Tukey's multiple comparisons was performed. \*\*\*\* denotes  $p < 0.0001$ . 7 day Pru  
784 and P $\Delta$ crt data was also used in Figure 1.

785

786 **SUPPLEMENTARY MATERIAL LEGENDS**

787 **Table S1. Primer sequences and PCR product sizes.**

788

789 **Figure S1. Targeted deletion of *CRT* in PRU $\Delta$ ku80 and PRU $\Delta$ ku80 $\Delta$ cpl.**

790 A. A vector carrying the BLE selection cassette flanked at both ends by 1500 bp of  
791 homologous regions upstream and downstream of the *CRT* gene was used to  
792 delete *CRT* by double cross-over homologous recombination.

793 B. Deletion of *CRT* was confirmed by PCR analyses using the primers indicated in  
794 each lane of the gel. Primer positions are shown in panel A. Primer sequences are  
795 provided in Table S1.

796

797 **Figure S2: Genetic complementation of *CRT* and integration of dT-ATG8.**

798 A. Complementation of *CRT* was accomplished by integrating a plasmid carrying the  
799 *CRT* cDNA cloned downstream of 1000 bp of *CRT* 5'UTR to drive transcription of  
800 these sequences. The plasmid was integrated upstream of the tubulin gene by  
801 introducing in the complement plasmid a 1425 bp fragment encompassing this locus  
802 and linearization using the *BclI* to induce single cross-over. The tdTomato-Tg Atg8  
803 expression cassette was integrated in the tubulin locus of the  $\Delta$ *crt* strain using the  
804 same strategy described for the *CRT* complementation strain.

805 B. Integration in the selected genome locus of the *CRT* complement or tdTomato-  
806 TgAtg8 plasmid was confirmed by PCR analysis. Primers used in these PCRs are  
807 indicated in panel A. Primer sequences are provided in Table S1.

808

809 **Figure S3: *In vitro* differentiation kinetics.**

810 Tachyzoite conversion into bradyzoite cysts was assessed over 4 days as  
811 determined by expression of GFP under the early bradyzoite promoter LDH2 or the

812 late bradyzoite marker BAG1 by IF staining. Bars are presented as mean +/- S.D. of  
813 3 independent experiments. The following parasitophorous vacuoles (PVs) were  
814 assessed on days 1, 2, 3, 4, respectively. Experiment 1: Pru (88, 175, 187, 144),  
815 P $\Delta$ crt (113, 166, 186, 204), P $\Delta$ crt:CRT (87, 124, 189, 182). Experiment 2: Pru (73,  
816 84, 200, 248), P $\Delta$ crt (88, 137, 205, 190), P $\Delta$ crt:CRT (59, 101, 109, 117).  
817 Experiment 3: Pru (64, 90, 69, 97), P $\Delta$ crt (80, 63, 135, 214), P $\Delta$ crt:CRT (65, 78, 96,  
818 132). One-way ANOVA with Tukey's multiple comparisons was performed for  
819 comparing genotypes on each day.

820

821 **Figure S4. CRT deficiency does not alter *in vitro* cyst size.**

822 Cyst size after 1 and 2 weeks of *in vitro* differentiation. Line represents mean +/-  
823 S.D. of bradyzoite cysts in 3 independent experiments. The following number of  
824 cysts were analyzed for each experiment for week 1: Pru (78, 52, 142), P $\Delta$ crt (49,  
825 90, 135), P $\Delta$ crt:CRT (89, 84, 87) and for week 2: Pru (111, 124, 102), P $\Delta$ crt (65,  
826 131, 95), P $\Delta$ crt:CRT (90, 107, 102). Kruskal Wallis with Dunn's multiple  
827 comparisons was performed.

828

**Figure 1**

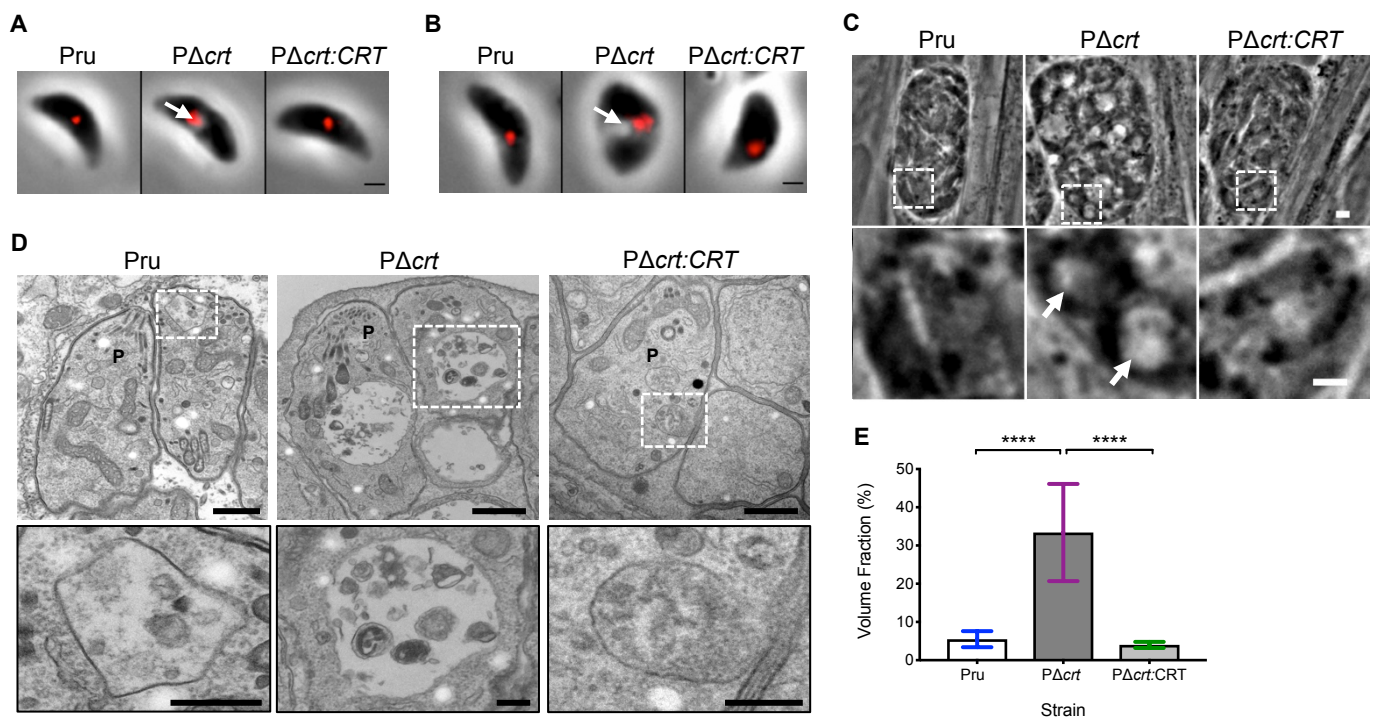

**Figure 2**

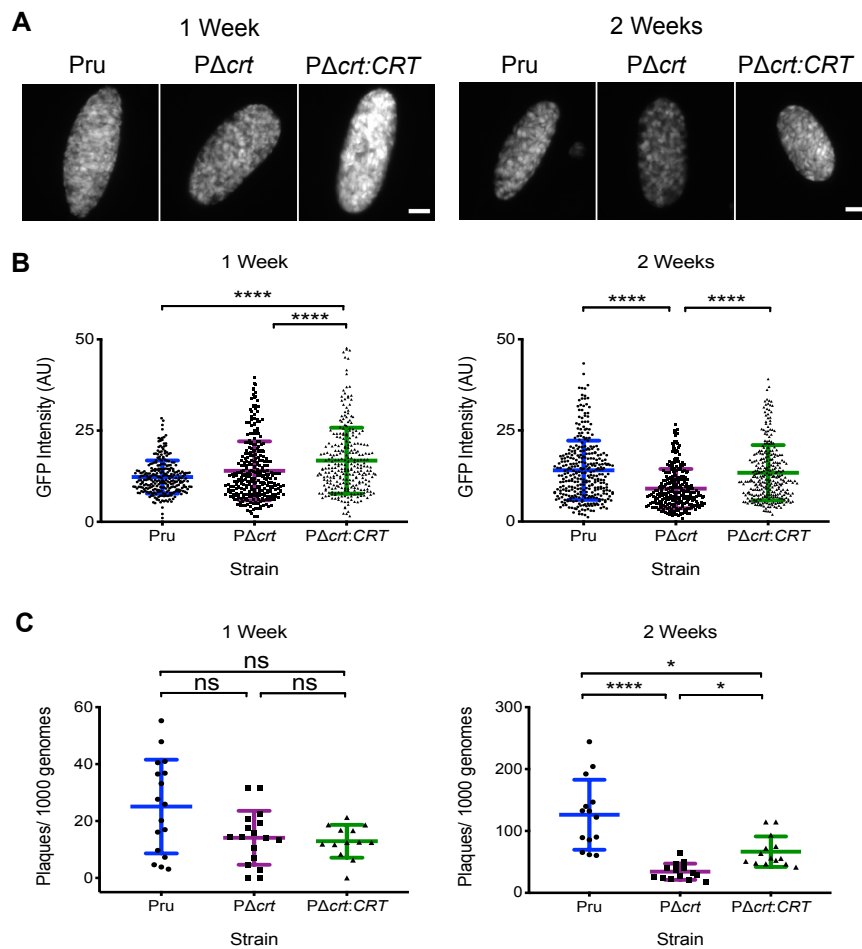

Figure 3

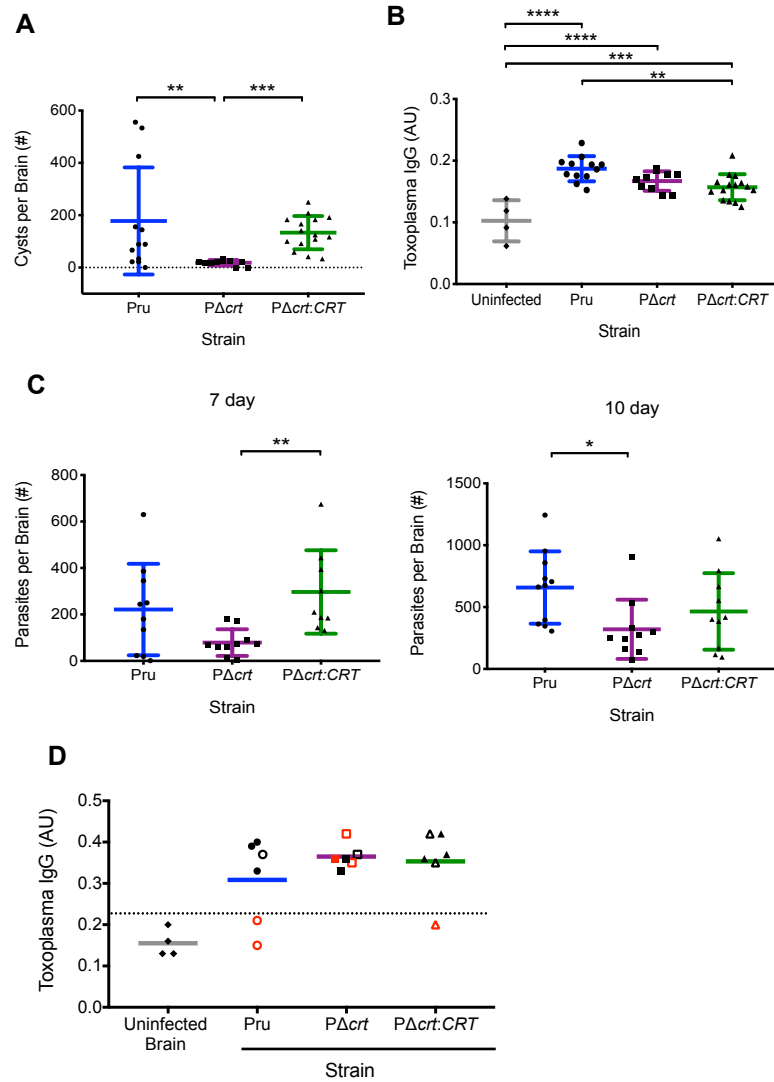

**Figure 4**

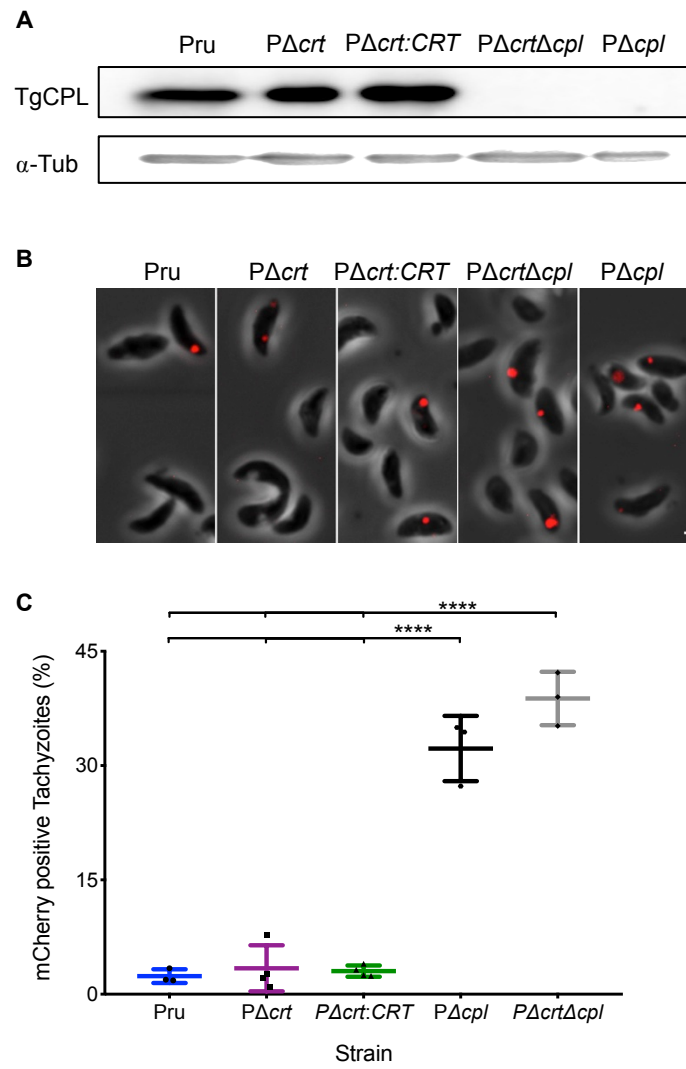

**Figure 5**

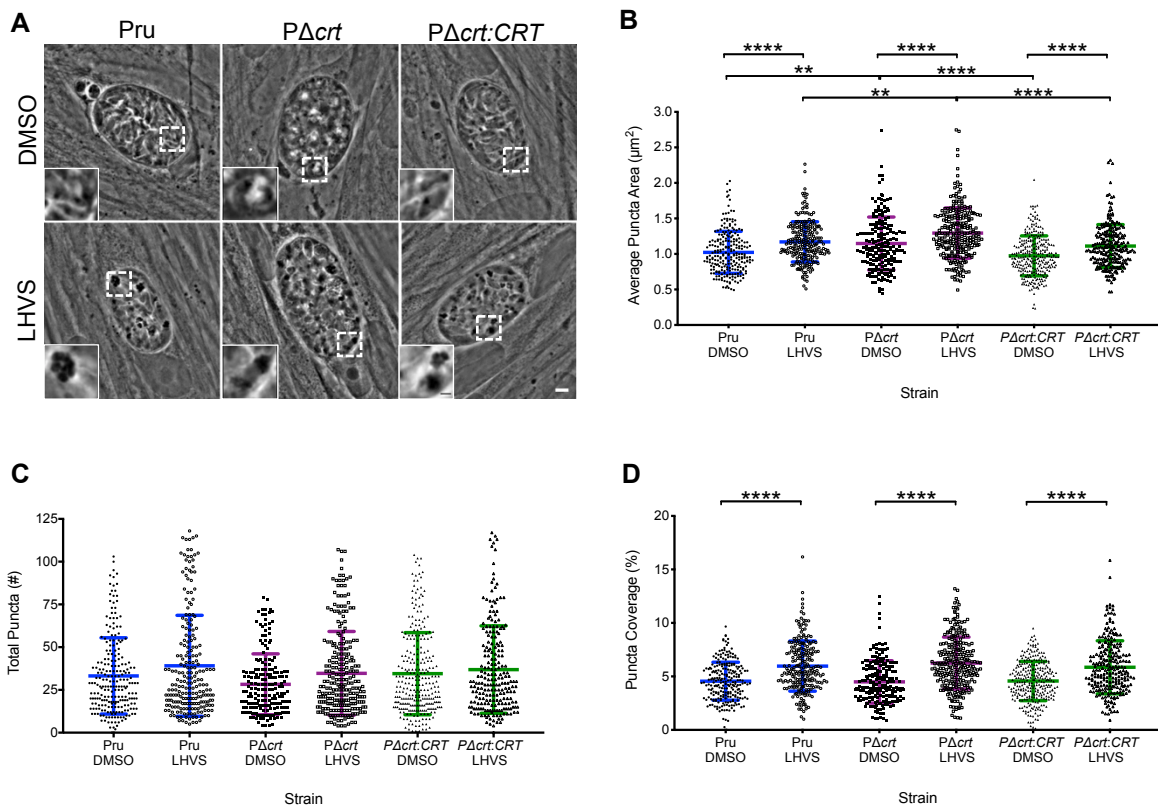



**Figure 6**

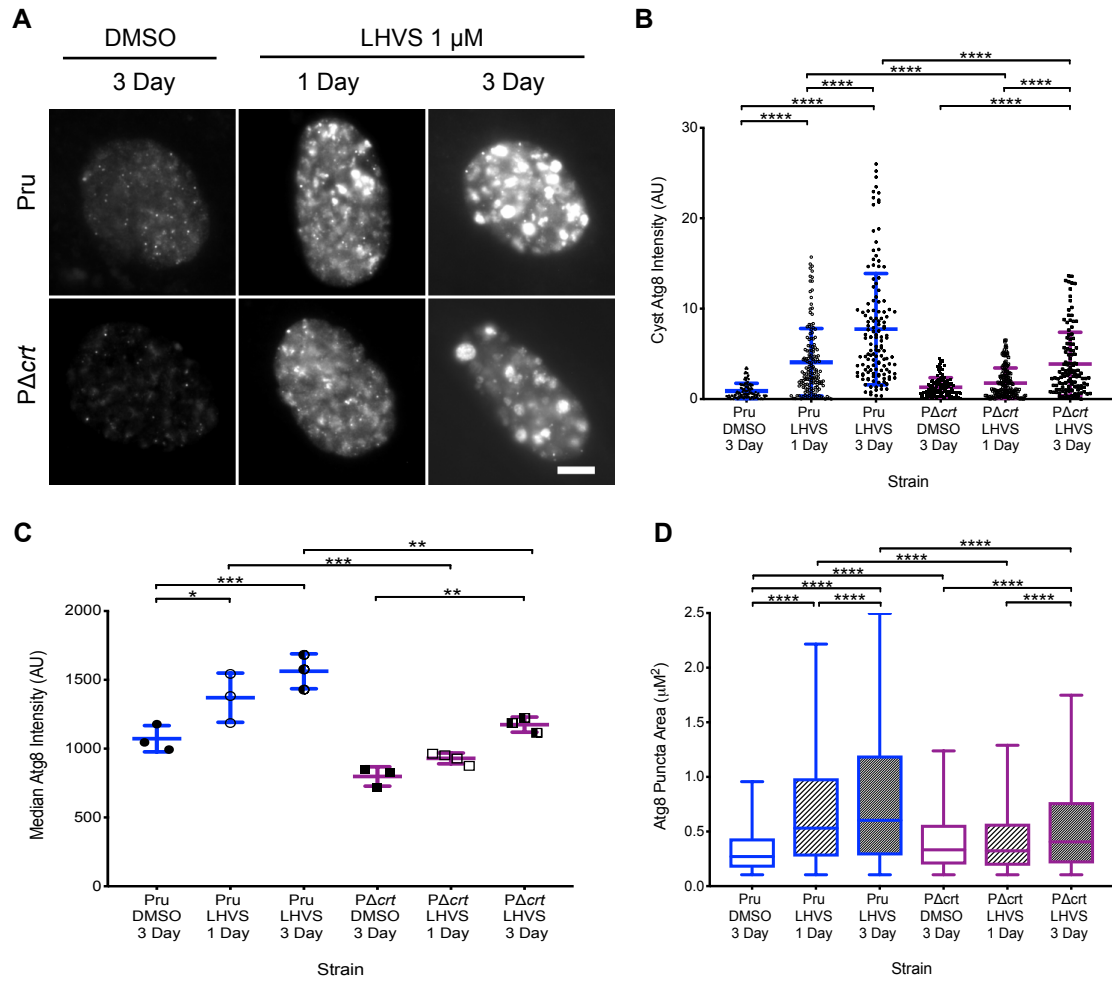

**Figure 7**

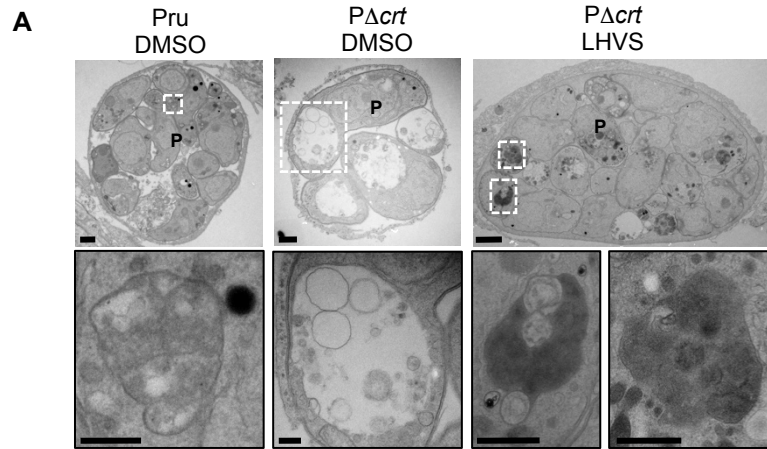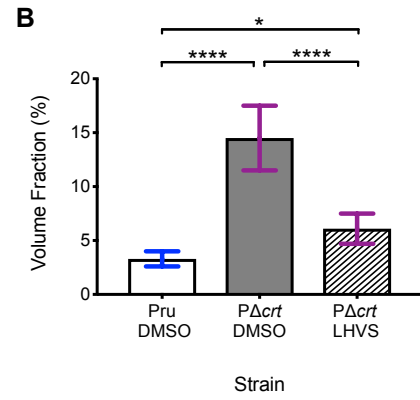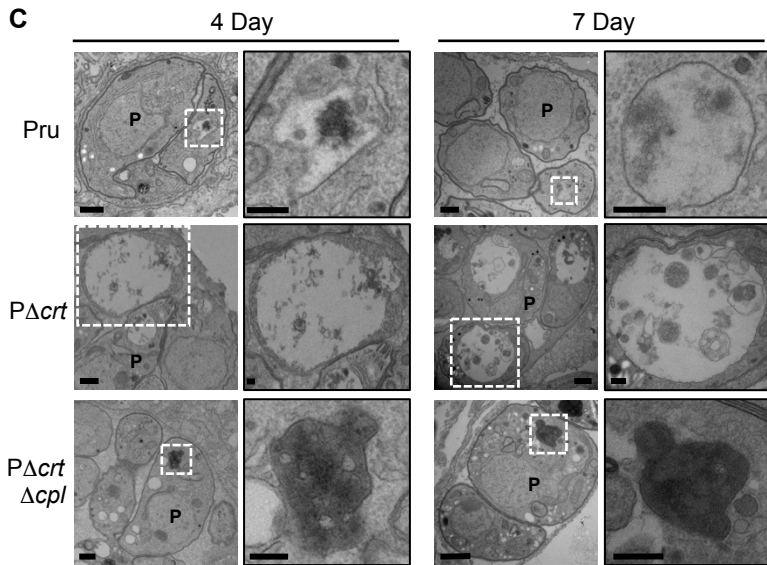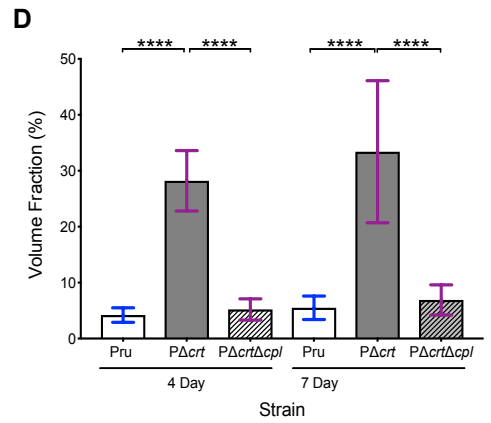

**Table S1**

| <b>Primer Name</b>                                                                 | <b>Forward Primer<br/>(5'-3')</b>         | <b>Reverse Primer<br/>(5'-3')</b>            | <b>Product<br/>Size (bp)</b> |
|------------------------------------------------------------------------------------|-------------------------------------------|----------------------------------------------|------------------------------|
| <b>Deletion of CRT (Fig. S1)</b>                                                   |                                           |                                              |                              |
| 5' ARM of CRT;<br>upstream of<br>BLE with <i>XhoI</i> /<br><i>HindIII</i> sites    | CCCCCTCGAGGTGCACCGTTTGACACATCTG<br>ATTGTG | TTCGAAGCTTGTGCGCTAGCACAGCTGTG<br>AGAGACTC    | 1530                         |
| 3' ARM of CRT;<br>downstream<br>of BLE with<br><i>BamHI</i> / <i>NotI</i><br>sites | GGGGGATCCATCGCCGAACAGAGTTGGTGG<br>CTACGAG | GGTGCGGCCGCGAGAGATTACCCCTACTG<br>CGCATCCGTAC | 1440                         |
| P1/P2                                                                              | GCGCCTTCGACGACAGACTGATGTTCTGAAG           | GTGAGTCCGGAGCCTGAGAGGTCCTTC                  | 1487                         |
| P3/P4                                                                              | GAAGAGCAGATCGGGACCATTTTCGTC               | CCCGTGCCTCCAGCGAAGCCTGTCTCTTC                | 1470                         |
| P5/P6                                                                              | GCTCTGTAGGACTTGCATCACCAACGAG              | GCGTGTGCGATACGAGCACCAGTACTAC                 | 1647                         |
| P7/P8                                                                              | CAGTTGTTTTAGTCGAACCGGTTAACA               | GGAGCAGCGGATGCAAGCCTTTTTCTGTG                | 1542                         |
| <b>Generation of CRT Complement (Fig. S2)</b>                                      |                                           |                                              |                              |
| P9/P14                                                                             | CAGCACGTGACTCGATGTTTACCGCTGTC             | CTCCGGCGTAGTCGGTGTACAAGGAG                   | 4546                         |
| P11/P12                                                                            | ATGGAGATGGCTGTCTAGTTAATTAATC              | CCTGGCCGACGTGGATGCTGATAACCTC                 | 2575                         |
| P13/14                                                                             | CACAGACTGCTTGTGTACCTCCGTG                 | GTATGCACAGCACCGATGATGGCCATC                  | 1490 (cDNA),<br>2837 (gDNA)  |
| <b>Generation of tdTomato-Atg8 (Fig. S2)</b>                                       |                                           |                                              |                              |
| 5' Atg8 Int                                                                        | CAG CAC GTG ACT CGA TGT TTA CCG CTG<br>TC | CCA TGC GCA CCT TGA AGC GCA TGA<br>ACT C     | 2842                         |
| 3' Atg8 Int                                                                        | CTA TCA GTTG TTT AGT CGA ACC GGT TAA<br>C | CTG GCC GAC GTG GAT AAC CTC                  | 2869                         |
| <b>Parasite burden qPCR (Fig. 3)</b>                                               |                                           |                                              |                              |
| <b>Tox9/11</b>                                                                     | AGG AGA GAT ATC AGG ACT GTA G             | GCG TCG TCT CGT CTA GAT CG                   |                              |
| <b>qPCR/Plaque assay (Fig. 2)</b>                                                  |                                           |                                              |                              |
| <b>α-TUB</b>                                                                       | GCG TCT TCT TGG ATT TGG AG                | TGG AGA CCA GTG CAG TTG TC                   |                              |

Figure S1

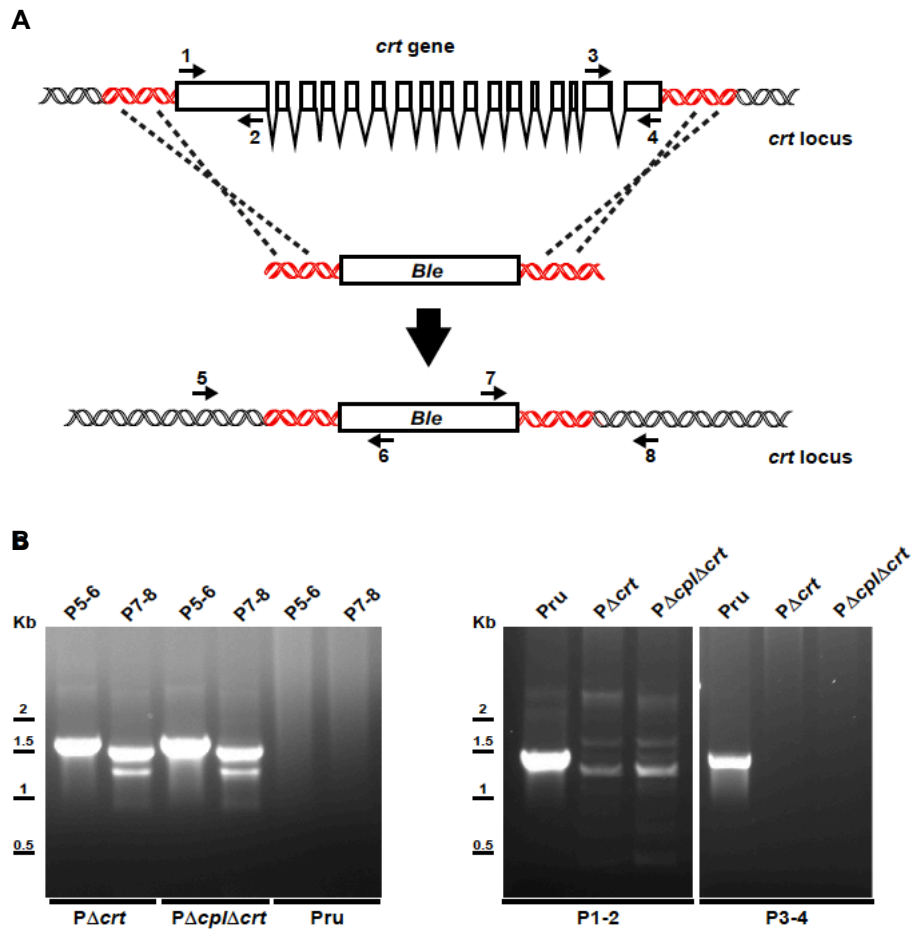

Figure S2

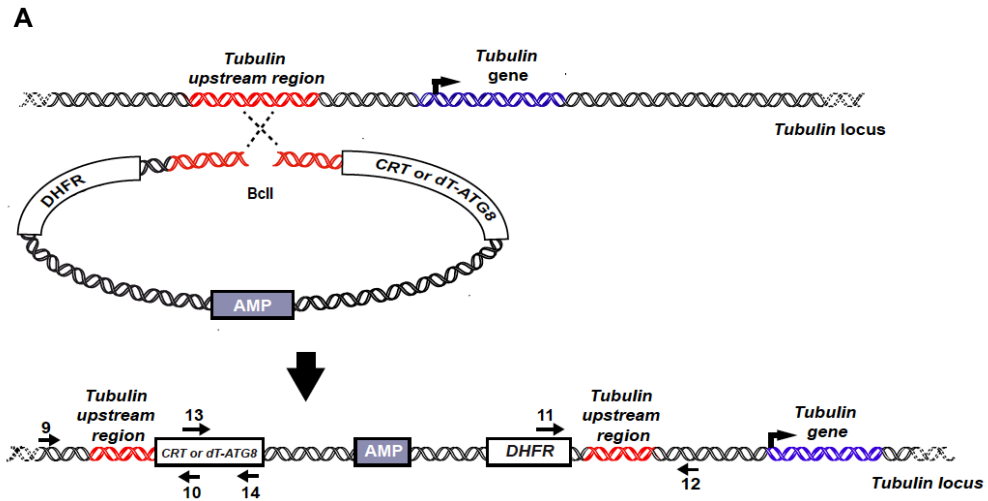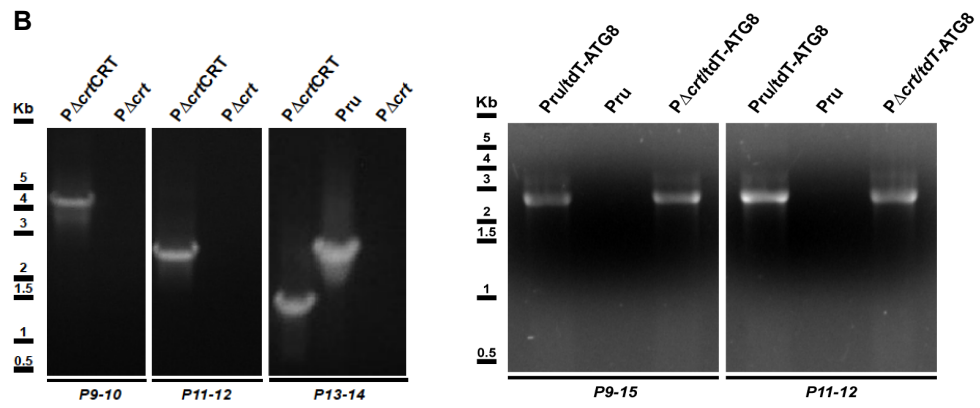

Figure S3

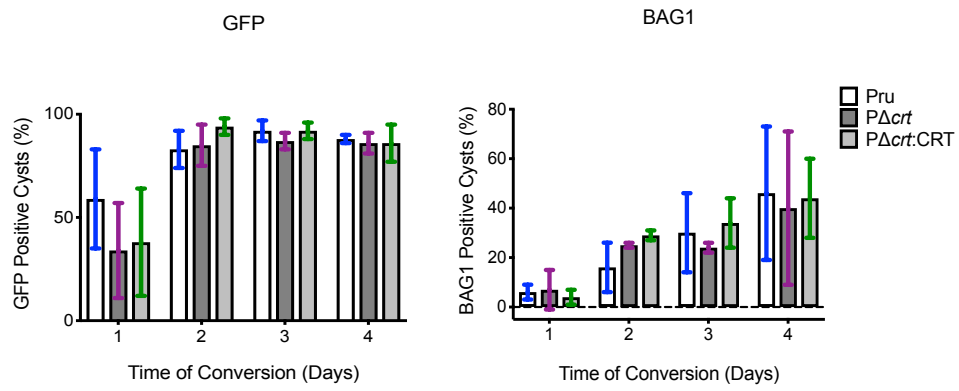

Figure S4

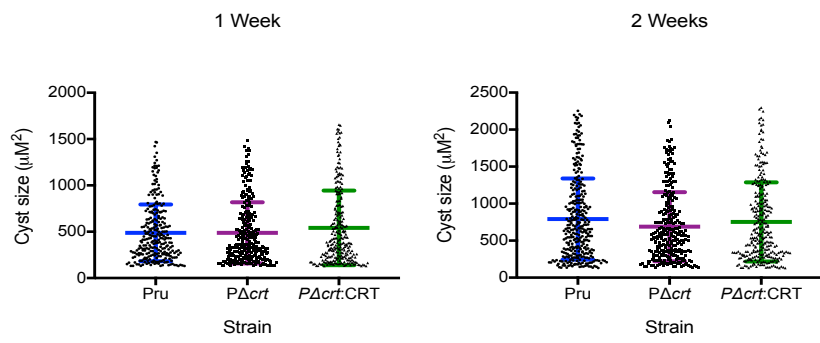

Figure S5

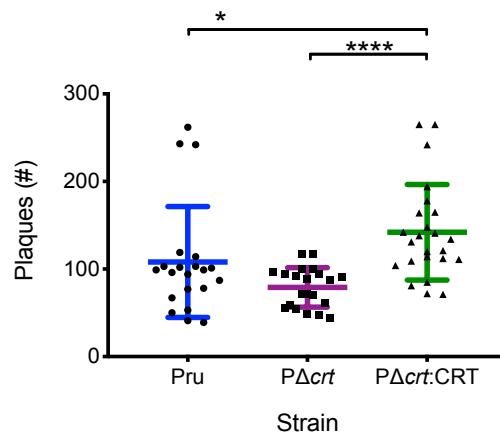

Source: https://www.biorxiv.org/content/10.1101/647669v1.full.pdf
